CORRECTION

## Correction: Italy's progress towards the objectives of the national action plan to combat antimicrobial resistance

Costanza Vicentini, Stefania di Giacomo, Luca Bresciano, Giulia Fadda, Adriano Grossi, Fortunato D'Ancona, Carla Maria Zotti, SPiNCAR Working Group

Table 1 was uploaded incorrectly. Please see the correct Table 1 here.

### Reference

1. Vicentini C, di Giacomo S, Bresciano L, Fadda G, Grossi A, D'Ancona F, et al. Italy's progress towards the objectives of the national action plan to combat antimicrobial resistance. PLoS One. 2026;21(4):e0347044. <https://doi.org/10.1371/journal.pone.0347044> PMID: [41984848](https://pubmed.ncbi.nlm.nih.gov/41984848/)

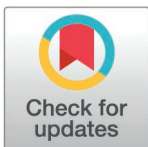

### OPEN ACCESS

**Citation:** Vicentini C, di Giacomo S, Bresciano L, Fadda G, Grossi A, D'Ancona F, et al. (2026) Correction: Italy's progress towards the objectives of the national action plan to combat antimicrobial resistance. PLoS One 21(6): e0352241. <https://doi.org/10.1371/journal.pone.0352241>

**Published:** June 22, 2026

**Copyright:** © 2026 Vicentini et al. This is an open access article distributed under the terms of the [Creative Commons Attribution License](https://creativecommons.org/licenses/by/4.0/), which permits unrestricted use, distribution, and reproduction in any medium, provided the original author and source are credited.

**Table 1. SPiNCAR scores, healthcare-associated infection (HAI) prevalence, antibiotic use prevalence, antimicrobial resistance (AMR) composite index, and antimicrobial consumption results for 13 regions of Italy, 2022.**

| <b>SPiNCAR scores</b>                                      | <b>Median score/maximum achievable score (interquartile range, IQR)</b> |                     | <b>Range</b> |
|------------------------------------------------------------|-------------------------------------------------------------------------|---------------------|--------------|
| Governance                                                 | 13/17 (15-16)                                                           |                     | 4-17         |
| Surveillance and monitoring                                | 22/29 (17-23)                                                           |                     | 9-29         |
| Appropriate antimicrobial use                              | 8/12 (7-10)                                                             |                     | 3-12         |
| HAI prevention and control                                 | 4/4 (2-4)                                                               |                     | 0-4          |
| Education and training                                     | 4/10 (2-7)                                                              |                     | 1-10         |
| Alliance among stakeholders                                | 3/12 (3-4)                                                              |                     | 1-8          |
| Evaluation of the impact and implementation of the program | 1/4 (1-4)                                                               |                     | 0-4          |
| <i>Overall score</i>                                       | <i>56/88 (48-66)</i>                                                    |                     | <i>32-82</i> |
| PPS data                                                   | n with condition of interest/total N                                    | Median % (IQR)      | Range        |
| HAI prevalence                                             | 4011/48,754                                                             | 8.12 (7.04-8.24)    | 3.94-11.46   |
| Antimicrobial use prevalence                               | 21,174/48,754                                                           | 43.94 (42.07-46.46) | 39.61-50.54  |
| AMR composite index                                        | 612/2257                                                                | 24.44 (19.31-35.39) | 10-48.61     |
| Consumption of systemic antimicrobials (9)                 | Median (IQR)                                                            |                     | Range        |
| Hospital consumption (DDDs/1000 pds)                       | 77.1 (75.5-82.6)                                                        |                     | 61.1-98.4    |
| Community consumption (DDDs/1000 inhabitants)              | 7.58 (6.76-10.95)                                                       |                     | 5.9-18.53    |

<https://doi.org/10.1371/journal.pone.0352241.t001>
